# Supplementary material for: Rapid global path planning algorithm for unmanned surface vehicles in large-scale and multi-island marine environments
Source: PeerJ Comput Sci. 2021 Jun 29;7:e612. doi: 10.7717/peerj-cs.612 (PMC8279141; doi:10.7717/peerj-cs.612)
Supplement: Supplemental Information 4 — Path planning for every typical path was repeated 10 times. The statistic information is shown in Table 4. [file peerj-cs-07-612-s004.xlsx]

## Sheet: Sheet1
Execution time of five typical paths which are calculated based on a single HSR grid map by applying the IDC-FM2 method. Path planning for every typical path was repeated 10 times. The statistic information is shown in Table 4.
Path1(ms)	Path2(ms)	Path3(ms)	Path4(ms)	Path5(ms)
28944.7	24764.4	29846.9	16230.1	40378.7
29328	24763.6	31336	16264.6	40407.8
29402.9	24509.1	30032.2	16345.5	40453
29410.2	24594.8	30212.9	16764.8	40350.9
29012.1	24554.7	30792.8	17152.2	40941.2
28983.2	24651.3	30104	16102	40044.8
29258.5	24446.6	29922.7	16430	40496.1
29164.8	24839.7	30182.3	16177.2	40277
29244	24765.8	29911.9	16412.5	40390.4
29347.2	24608.7	30181.1	16481.1	40238.2
min(ms)
28944.7	24446.6	29846.9	16102	40044.8
max(ms)
29410.2	24839.7	31336	17152.2	40941.2
avg(ms)
29209.6	24649.9	30252.3	16436	40397.8
